# Supplementary material for: Genome-Wide DNA Methylation Profiling in the Lotus (Nelumbo nucifera) Flower Showing its Contribution to the Stamen Petaloid
Source: PubMed Central journal article supplement (PMC6572404; doi:10.3390/plants8050135), 2019-05-20
Supplement: plants-08-00135-s001.pdf [file plants-08-00135-s001.pdf]

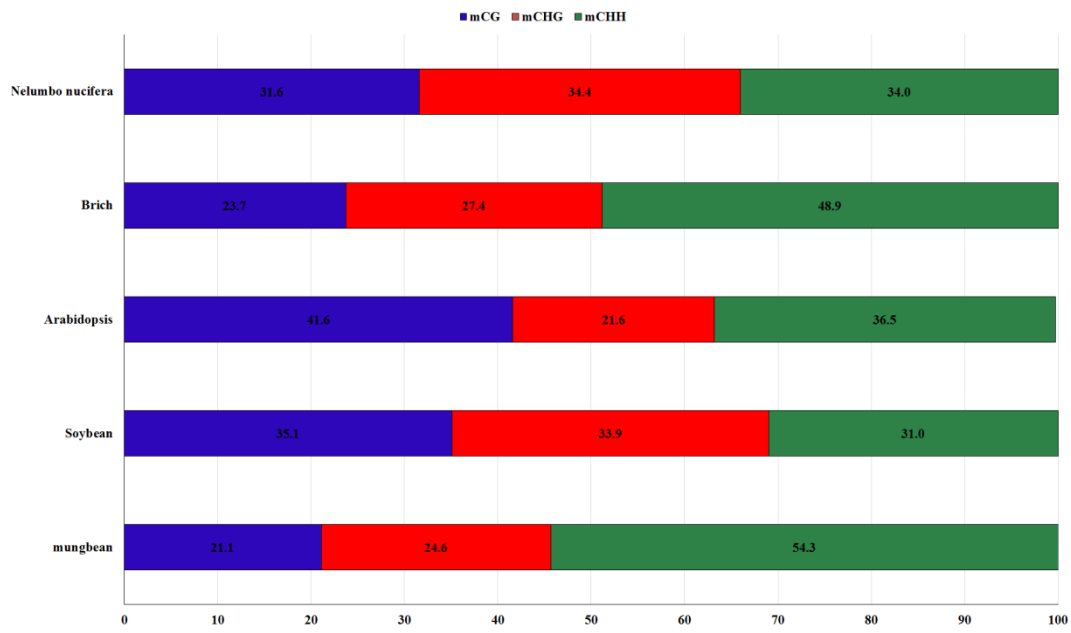

Figure S1. The proportion of mCGs, mCHGs, and mCHHs in plants.

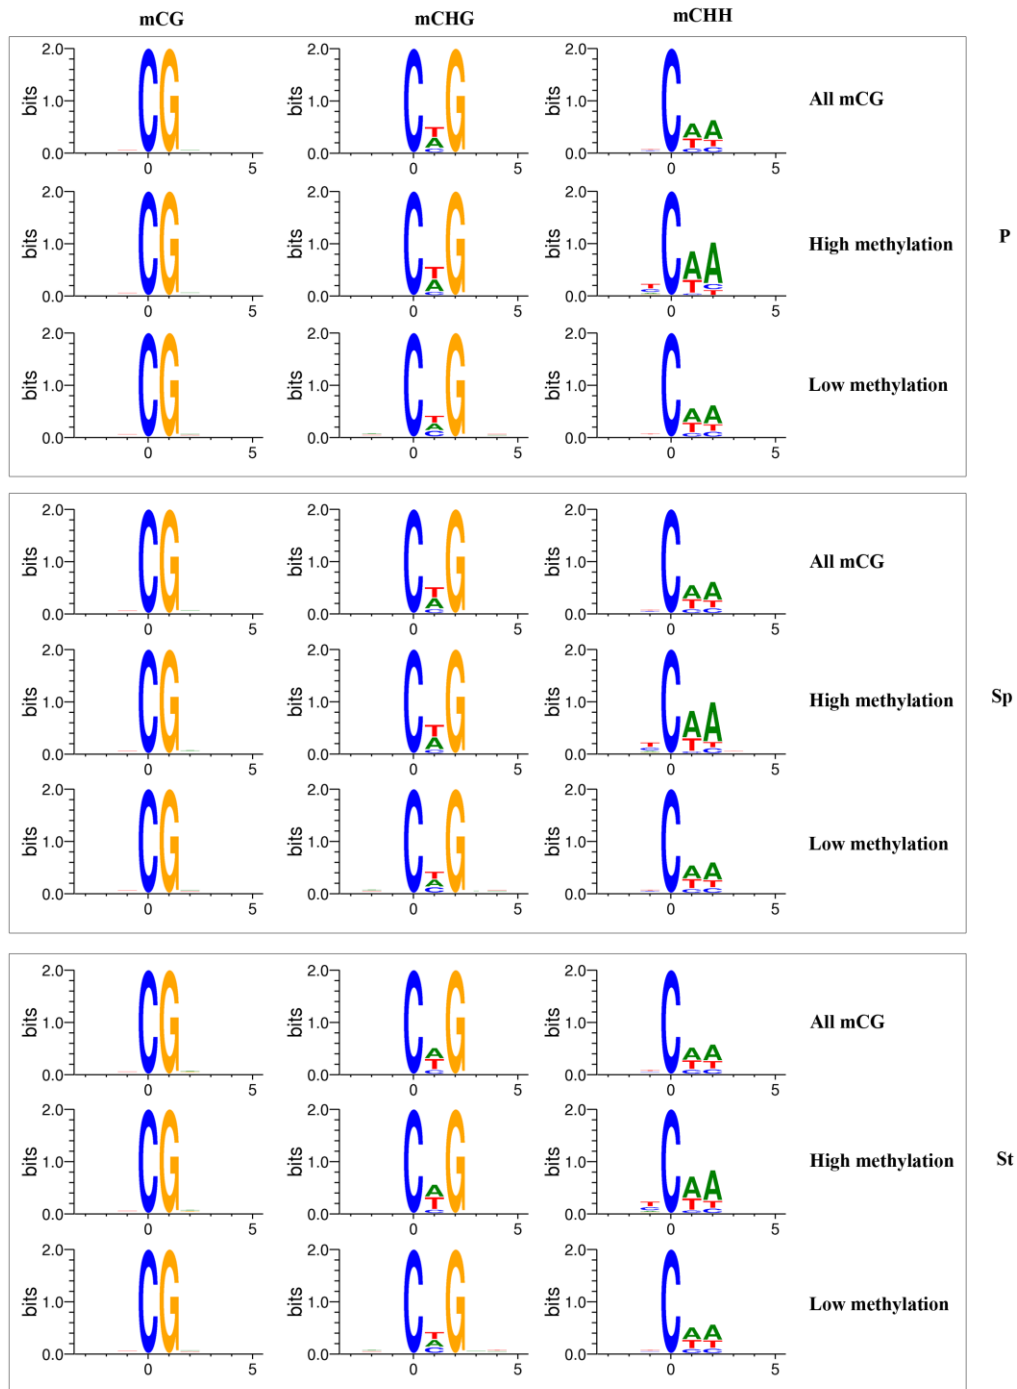

**Figure S2. Sequence preferences for methylation in CG, CHG, and CHH contexts.** The mC site methylation level was divided into three groups: All mC sites; High Methylation ( $ML \geq 0.75$ ), Low Methylation ( $ML < 0.75$ ). ML indicated methylation level.

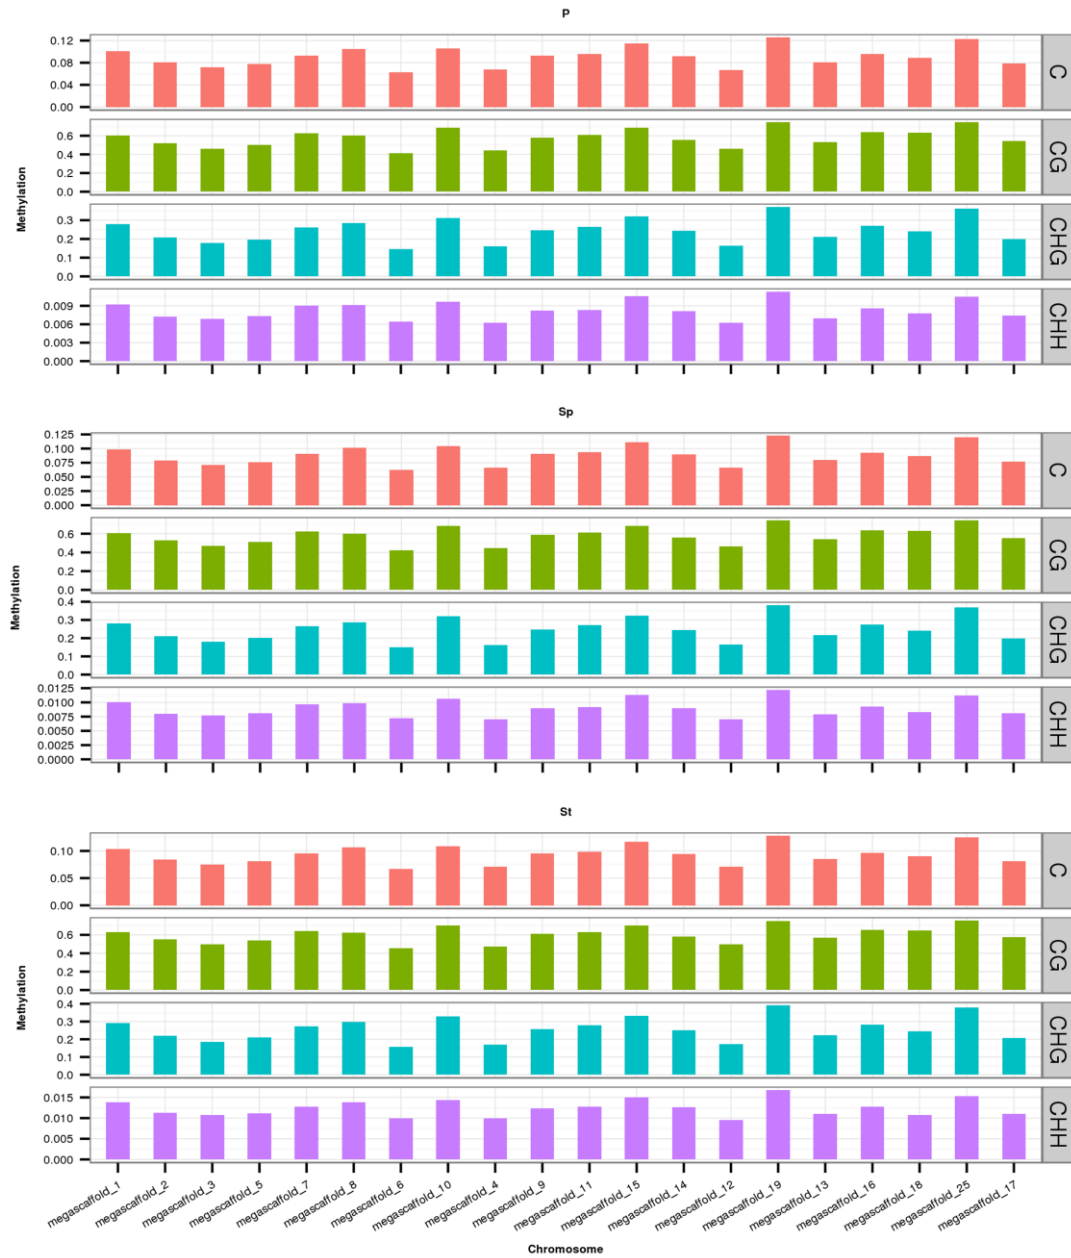

Figure S3. The distribution of methylated cytosine in all contexts in the main chromosome.

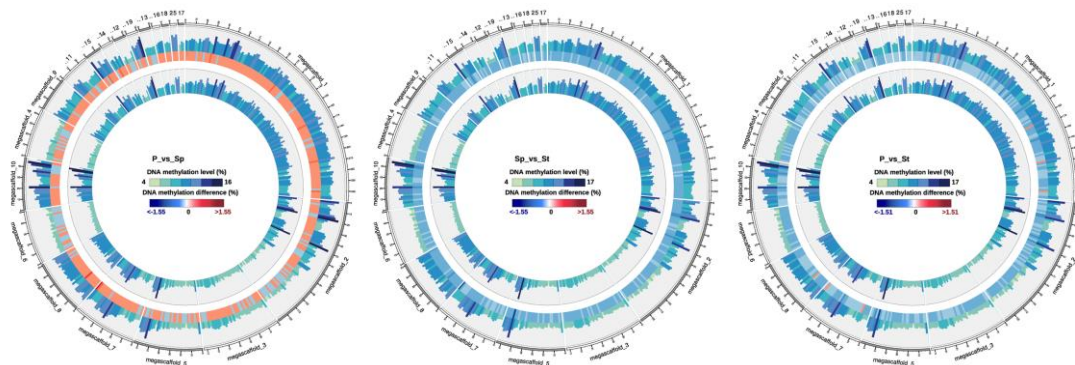

Figure S4. A circos plot of DNA methylation in P vs Sp, Sp vs St, and P vs St.

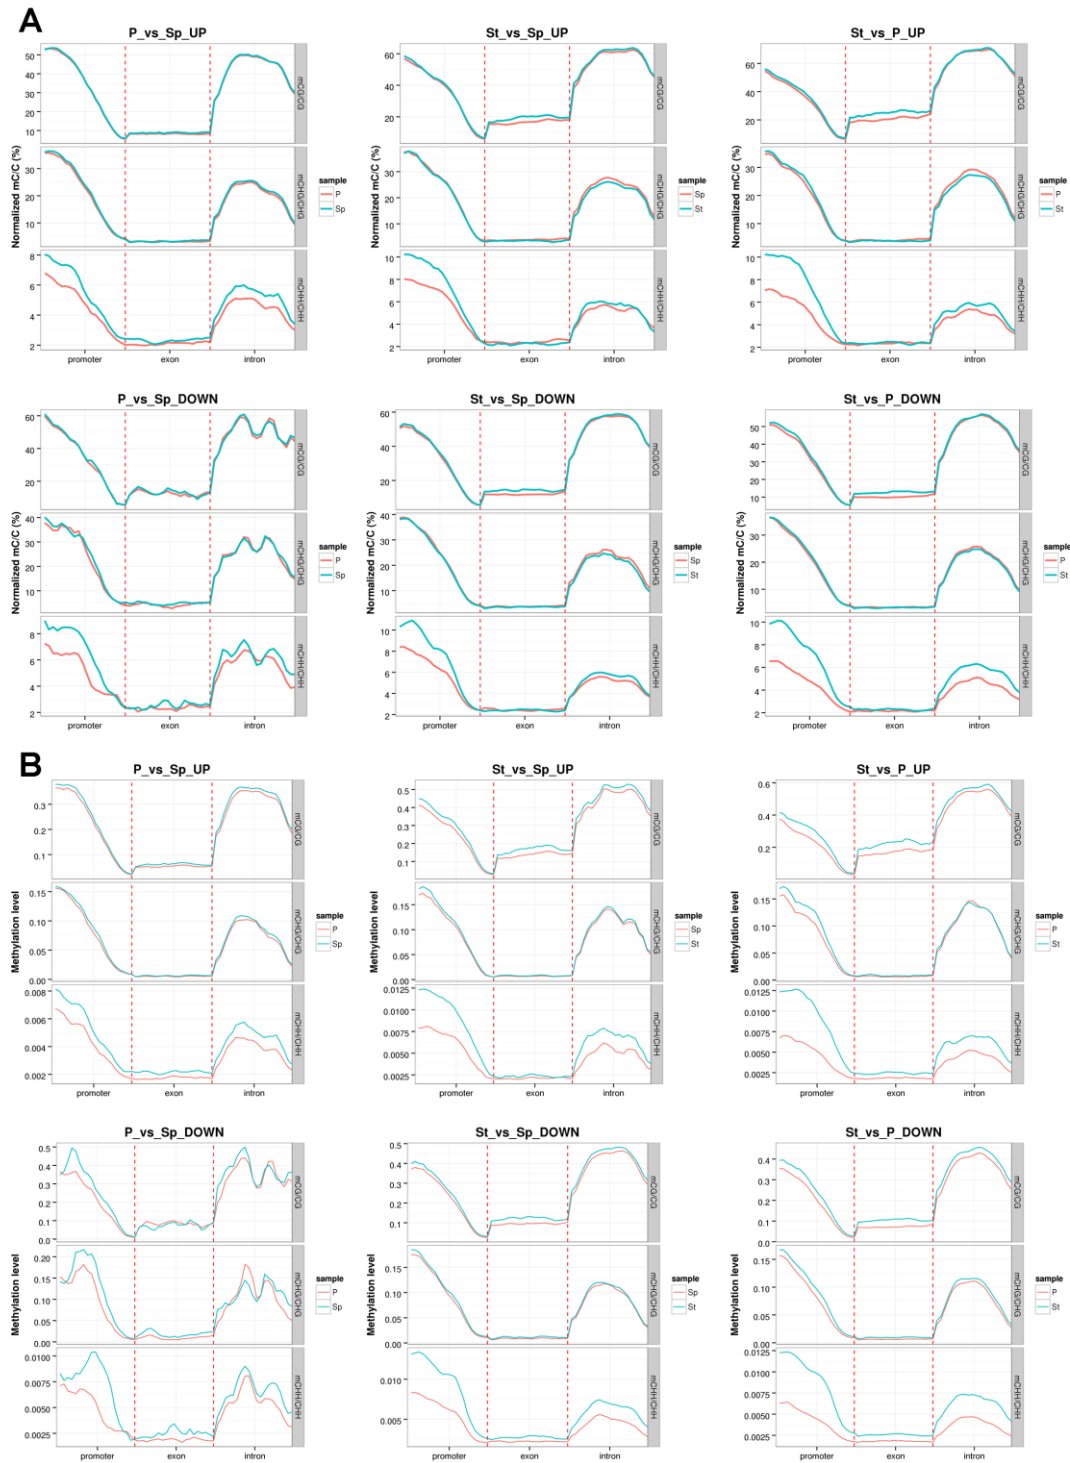

**Figure S5. The DNA methylation patterns in gene regions in DEGs. (A)** The DNA Methylation density of DEGs (P vs Sp, St vs Sp, and St vs P) throughout the gene regions in different floral organs. **(B)** The DNA Methylation level of DEGs (P vs Sp, St vs Sp, and St vs P) throughout the gene regions in different floral organs.

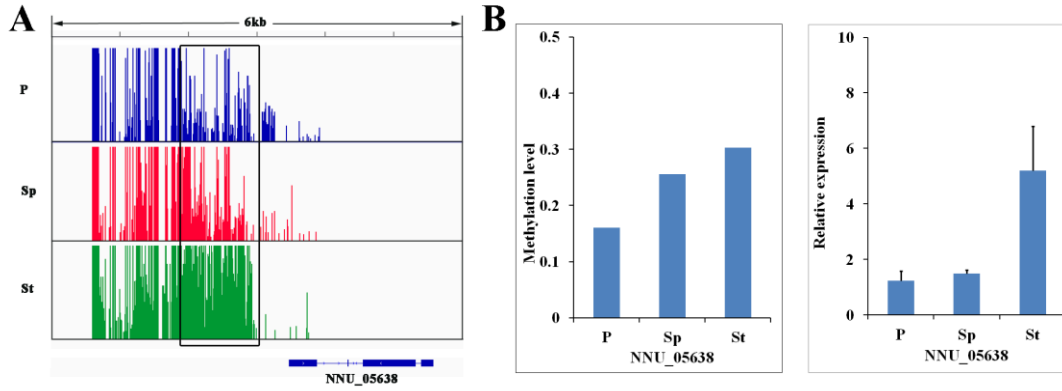

**Figure S6.** IGV software depicts the demethylation of NNU\_05638 promoter region promoting stamen to petaloid (A) and the methylation difference and expression analysis of NNU\_05638 in P, Sp, and St (B).

**Table S1.** Summary of sequencing and reads.

| Sample name | Raw Reads | Raw Bases (G) | Clean Reads | Clean Bases (G) | Clean ratio (%) | Q20 (%) | GC Content (%) | BS Conversion Rate (%) | Mapped reads | Mapping rate (%) | Duplication rate (%) | Genome coverage mean | Cytosines coverage mean |
|-------------|-----------|---------------|-------------|-----------------|-----------------|---------|----------------|------------------------|--------------|------------------|----------------------|----------------------|-------------------------|
| P           | 122171421 | 36.65         | 116929861   | 32.55           | 88.81           | 96.1    | 22.23          | 99.835                 | 88738071     | 75.89            | 8.89                 | 21.26                | 12.7                    |
| Sp          | 119687017 | 35.91         | 115231027   | 32.24           | 89.78           | 96.34   | 21.54          | 99.809                 | 86089100     | 74.71            | 9.00                 | 20.68                | 12.3                    |
| St          | 117771103 | 35.33         | 113981900   | 31.84           | 90.12           | 96.45   | 21.37          | 99.778                 | 86797216     | 76.15            | 9.33                 | 20.74                | 11.9                    |

**Table S2.** Summary of methylcytosines in each sequence context.

| Sample | P                 |          | Sp                |          | St                |          | Mean              |
|--------|-------------------|----------|-------------------|----------|-------------------|----------|-------------------|
|        | proportion of mCs | reads    | proportion of mCs | reads    | proportion of mCs | reads    | proportion of mCs |
| mCG    | 33.14%            | 15307291 | 31.66%            | 14635358 | 30.04%            | 13602715 | 31.61%            |
| mCHG   | 35.83%            | 16554080 | 34.94%            | 16150150 | 32.42%            | 14681366 | 34.40%            |
| mCHH   | 31.03%            | 14334879 | 33.39%            | 15434846 | 37.54%            | 16999686 | 33.99%            |

**Table S3.** List of hypomethylated DMR-associated genes in all organs.

**Hypomethylated DMR-associated up-regulated genes in P vs Sp**

| Gene ID   | Annotation                                              |
|-----------|---------------------------------------------------------|
| NNU_14779 | uncharacterized protein LOC104603194 [Nelumbo nucifera] |

**Hypomethylated DMR-associated down-regulated genes in P vs Sp**

| Gene ID   | Annotation                                             |
|-----------|--------------------------------------------------------|
| NNU_03683 | PK1: Putative receptor protein kinase ZmPK1 (Zea mays) |
| NNU_25355 | ARA12: Subtilisin-like protease (Arabidopsis thaliana) |

**Hypomethylated DMR-associated up-regulated genes in Sp vs St**

| Gene ID | Annotation |
|---------|------------|
|---------|------------|

NNU\_05638 PUB33: U-box domain-containing protein 33 (Arabidopsis thaliana)

#### Hypomethylated DMR-associated up-regulated genes in P vs St

| Gene ID   | Annotation                                                                                     |
|-----------|------------------------------------------------------------------------------------------------|
| NNU_00424 | Protein of unknown function                                                                    |
| NNU_00560 | gluP: Rhomboid protease gluP (Bacillus subtilis)                                               |
| NNU_01525 | Protein of unknown function                                                                    |
| NNU_01772 | CYP71A1: Cytochrome P450 71A1 (Persea americana)                                               |
| NNU_03180 | V-type proton ATPase catalytic subunit A (Daucus carota)                                       |
| NNU_03373 | GSVIVT00027310001: UPF0497 membrane protein 16 (Vitis vinifera)                                |
| NNU_05638 | PUB33: U-box domain-containing protein 33 (Arabidopsis thaliana)                               |
| NNU_09335 | AGD5: Probable ADP-ribosylation factor GTPase-activating protein AGD5 (Arabidopsis thaliana)   |
| NNU_11143 | LAL5: MATE efflux family protein LAL5 (Arabidopsis thaliana)                                   |
| NNU_14184 | AGD11: Probable ADP-ribosylation factor GTPase-activating protein AGD11 (Arabidopsis thaliana) |
| NNU_14834 | Putative clathrin assembly protein At1g25240 (Arabidopsis thaliana)                            |
| NNU_15184 | Protein of unknown function                                                                    |
| NNU_16725 | ADH: Alcohol dehydrogenase (Fragaria ananassa)                                                 |
| NNU_19124 | DREB1E: Dehydration-responsive element-binding protein 1E (Arabidopsis thaliana)               |
| NNU_21147 | ELI3: Probable mannitol dehydrogenase (Mesembryanthemum crystallinum)                          |
| NNU_22678 | ZNF828: Zinc finger protein 828 (Homo sapiens)                                                 |
| NNU_23350 | PXL2: Leucine-rich repeat receptor-like protein kinase PXL2 (Arabidopsis thaliana)             |
| NNU_24014 | SRPK1: Serine/threonine-protein kinase SRPK1 (Homo sapiens)                                    |

#### Hypomethylated DMR-associated down-regulated genes in P vs St

| Gene ID   | Annotation                                                                                         |
|-----------|----------------------------------------------------------------------------------------------------|
| NNU_08735 | SEC22: 25.3 kDa vesicle transport protein (Arabidopsis thaliana)                                   |
| NNU_20806 | Protein of unknown function                                                                        |
| NNU_19557 | Probable peptide/nitrate transporter At1g72125                                                     |
| NNU_13621 | Uncharacterized protein At4g06744 (Arabidopsis thaliana)                                           |
| NNU_01487 | 4-coumarate--CoA ligase 2 (Glycine max)                                                            |
| NNU_08358 | SCPL35: Serine carboxypeptidase-like 35 (Arabidopsis thaliana)                                     |
| NNU_03683 | PK1: Putative receptor protein kinase ZmPK1 (Zea mays)                                             |
| NNU_07659 | PSRP3: 30S ribosomal protein 3%2C chloroplastic (Spinacia oleracea)                                |
| NNU_00792 | bysl: Bystin (Nematostella vectensis)                                                              |
| NNU_15841 | GGR: Geranylgeranyl pyrophosphate synthase-related protein%2C chloroplastic (Arabidopsis thaliana) |
| NNU_08534 | UBC4: Ubiquitin-conjugating enzyme E2 4 (Arabidopsis thaliana)                                     |

**Table S4.** The primers for qRT-PCR.

| Gene name | Forward primer (5'-3') | Reverse primer (5'-3') |
|-----------|------------------------|------------------------|
| NUU_01774 | GATGGTGCTGAGGGTGAGTG   | ATCAACAGCCCACCTCGTAA   |
| NUU_11434 | TGATGTTGTGACGGTAGCCC   | CGGTAAACCCTCCAGAAGAC   |
| NUU_17480 | CTATGGTCGCTTGTTCCTG    | TCTGAGGCACTTGCCTAATAG  |
| NUU_17715 | GATTATCCCACCGCTCACTC   | AAAGCCTCGCACCAGTCG     |
| NUU_21025 | ATGCTATGAGGATGGGACA    | ATTCATTGCTGTTTGCCAC    |
| NUU_24864 | ATACGCCAGTGGTAGAACAAC  | CAGCAAGGTCCAACCGAAG    |
| NUU_05638 | TGAAAGGATGGCTGGAGGG    | AACGAAGAGCGTGATTAGGGA  |

**Table S5.** Three primers designed for bisulphate sequencing PCR on the promoter of NUU\_05638.

| Primer site (bp) | Forward primer (5'-3')    | Reverse primer (5'-3')     |
|------------------|---------------------------|----------------------------|
| -1648 to -1396   | GGGATTAAATTTGGATTGAAGTTTA | AACCACCCACCTTTTTAAAAATAAA  |
| -777 to -333     | TTATTTTGGTTATTGGTGTAATGT  | CTACTAAACCCATTAAATCCAATTT  |
| -348 to -61      | TTAATGGGTTTAGTAGTGGAGG    | ATTCRATAACAAAATCTATAAACAAA |
